# Supplementary material
Source: PubMed Central journal article supplement (PMC4186403)

## APPENDIX: SUPPORTING INFORMATION

Supplemental Table 1: Primer sequences

| Gene name    |         | Primers                   | Reference                                     |
|--------------|---------|---------------------------|-----------------------------------------------|
| GAPDH        | Forward | AGCCAAACGGGTCATCATCTC     |                                               |
|              | Reverse | GGGGGCTAAGCAGTTGGTG       |                                               |
| Fmo3         | Forward | CAGCATTTACCAATCGGTCTTC    | (Zhang et al., 2009)                          |
|              | Reverse | TGACTTCCCATTTGCCAGTAG     |                                               |
| AGP          | Forward | CTTCGGGAGTCTCAAACAATAGGT  | (Richardson and Morgan, 2005)                 |
|              | Reverse | GACAGTCCCCGTTTCTTCTCATCC  |                                               |
| SAP          | Forward | AGGGCAGAGACAATGAGCTACT    | (Shirai et al., 2009)                         |
|              | Reverse | GGACTCCCAAGTGGTACATAGG    |                                               |
| SAA          | Forward | GTAATTGGGGTCTTTGCC        | (Lan et al., 2005)<br>(Reigstad et al., 2009) |
|              | Reverse | TTCTGCTCCCTGCTCCTG        |                                               |
| IL-1         | Forward | CAACCAACAAGTGATATTCTCCATG | (Overbergh et al., 2003)                      |
|              | Reverse | GATCCACACTCTCCAGCTGCA     |                                               |
| IL-6         | Forward | CAACCACGGCCTTCCCTACT      | (Richardson and Morgan, 2005)                 |
|              | Reverse | TCATTTCCACGATTTCCAGAG     |                                               |
| IFN $\gamma$ | Forward | AACGCTACACACTGCATCTTGG    | (Grabie et al., 2003)<br>(Klein et al., 2005) |
|              | Reverse | GCCGTGGCAGTAACAGCC        |                                               |
| TNF $\alpha$ | Forward | GACAAGGCTGCCCCGACTACG     | (Richardson and Morgan, 2005)                 |
|              | Reverse | CTTGGGGCAGGGGCTCTTGAC     |                                               |
| Cyp1a2       | Forward | TGGAGCTGGCTTTGACACAG      | (Pan et al., 2000)                            |
|              | Reverse | CGTTAGGCCATGTCACAAGTAGC   |                                               |
| Cyp2a4/5     | Forward | CTCGCCGAATTGTGGTGCTGTG    | (Richardson and Morgan, 2005)                 |
|              | Reverse | CCCGCTGCTGAAGGCTATGC      |                                               |
| Cyp2b10      | Forward | CAGGTGATCGGCTCACACC       | (Pan et al., 2000)                            |
|              | Reverse | TGACTGCATCTGAGTATGGCATT   |                                               |
| Cyp2c29      | Forward | AAGGTTTTGGCGTTGTTTTAGC    | (Richardson and Morgan, 2005)                 |
|              | Reverse | AGCCTTTGGTTTTCTCAGTTCTT   |                                               |

|         |         |                          |                               |
|---------|---------|--------------------------|-------------------------------|
| Cyp2d9  | Forward | CCTCCAAGGTCAGAAGTCCTTCA  | (Blume et al., 2000)          |
|         | Reverse | CGATTTCTTGTGGACTCTGCG    |                               |
| Cyp2d22 | Forward | GGGCCTTTGTTACCATGTTGG    | (Blume et al., 2000)          |
|         | Reverse | TACTCGGCGCTGCACATCTG     |                               |
| Cyp3a11 | Forward | GGATGAGATCGATGAGGCTCTG   | (Pan et al., 2000)            |
|         | Reverse | CAGGTATTCCATCTCCATCACAGT |                               |
| Cyp3a13 | Forward | CCTCTGCCTTTCTTGGGGACGAT  | (Richardson and Morgan, 2005) |
|         | Reverse | CCGCCGTTTTGTGAAGGTAGAGT  |                               |
| Cyp3a25 | Forward | TTGGAGGCCTGAACTGCTAAAG   |                               |
|         | Reverse | CTGTGGGCCCTCATAAAACC     |                               |
| Cyp4a10 | Forward | TGTCCCAGGCATTGTCAGAGA    | (Richardson and Morgan, 2005) |
|         | Reverse | CCTTCGGGTTGTGGTGGAGA     |                               |
| Cyp4a12 | Forward | TGAGTCCTATGAAAGAGTGCC    | (Nilakantan et al., 2008)     |
|         | Reverse | CTGGAAGCCCAGCAGAAGGTG    |                               |
| Cyp4a14 | Forward | CCCAAAGGTATCACAGCCACAA   | (Richardson and Morgan, 2005) |
|         | Reverse | CAGCAATTCAAAGCGGAGCAG    |                               |
| Cyp4f18 | Forward | AGAGCCTGGTGCGAACCTT      | (Chaluvadi et al., 2009)      |
|         | Reverse | TGGAATATGCGGATGACTGG     |                               |

- Blume N, Leonard J, Xu ZJ, Watanabe O, Remotti H, and Fishman J (2000) Characterization of Cyp2d22, a novel cytochrome P450 expressed in mouse mammary cells. *Archives of Biochemistry and Biophysics* 381 (2):191-204.
- Chaluvadi MR, Kinloch RD, Nyagode BA, Richardson TA, Raynor MJ, Sherman M, Antonovic L, Strobel HW, Dillehay DL, and Morgan ET (2009) Regulation of hepatic cytochrome P450 expression in mice with intestinal or systemic infections of *Citrobacter rodentium*. *Drug Metabolism and Disposition* 37 (2):366-374.
- Grabie N, Hsieh DT, Buono C, Westrich JR, Allen JA, Pang H, Stavrakis G, and Lichtman AH (2003) Neutrophils sustain pathogenic CD8+ T cell responses in the heart. *American Journal of Pathology* 163 (6):2413-2420.
- Klein RS, Lin E, Zhang B, Luster AD, Tollett J, Samuel MA, Engle M, and Diamond MS (2005) Neuronal CXCL10 directs CD8+ T-cell recruitment and control of West Nile virus encephalitis. *Journal of Virology* 79 (17):11457-11466.

- Lan JG, Cruickshank SM, Singh JC, Farrar M, Lodge JP, Felsburg PJ, and Carding SR (2005) Different cytokine response of primary colonic epithelial cells to commensal bacteria. *World Journal of Gastroenterology* 11 (22):3375-3384.
- Nilakantan V, Maenpaa C, Jia G, Roman RJ, and Park F (2008) 20-HETE-mediated cytotoxicity and apoptosis in ischemic kidney epithelial cells. *American Journal of Physiology Renal Physiology* 294 (3):F562-570.
- Overbergh L, Giulietti A, Valckx D, Decallonne R, Bouillon R, and Mathieu C (2003) The use of real-time reverse transcriptase PCR for the quantification of cytokine gene expression. *Journal of Biomolecular Techniques* 14 (1):33-43.
- Pan J, Xiang Q, and Ball S (2000) Use of a novel real-time quantitative reverse transcription-polymerase chain reaction method to study the effects of cytokines on cytochrome P450 mRNA expression in mouse liver. *Drug Metabolism and Disposition* 28 (6):709-713.
- Reigstad CS, Lunden GO, Felin J, and Backhed F (2009) Regulation of serum amyloid A3 (SAA3) in mouse colonic epithelium and adipose tissue by the intestinal microbiota. *PLoS One* 4 (6):e5842.
- Richardson TA and Morgan ET (2005) Hepatic cytochrome P450 gene regulation during endotoxin-induced inflammation in nuclear receptor knockout mice. *Journal of Pharmacology and Experimental Therapeutics* 314 (2):703-709.
- Shirai R, Hirano F, Ohkura N, Ikeda K, and Inoue S (2009) Up-regulation of the expression of leucine-rich alpha(2)-glycoprotein in hepatocytes by the mediators of acute-phase response. *Biochemical and Biophysical Research Communications* 382 (4):776-779.
- Zhang J, Chaluvadi MR, Reddy R, Motika MS, Richardson TA, Cashman JR, and Morgan ET (2009) Hepatic flavin-containing monooxygenase gene regulation in different mouse inflammation models. *Drug Metabolism and Disposition* 37 (3):462-468.

Supplemental Fig. 1. *Citrobacter rodentium* colony counts in liver, blood and colon of infected mice. Bacterial counts in colon and liver are expressed per g tissue, whereas counts in blood are per ml whole blood. Values represent mean colony forming units  $\pm$  S.E.M. (n=6). One-way ANOVA determined that there were no differences among the groups.

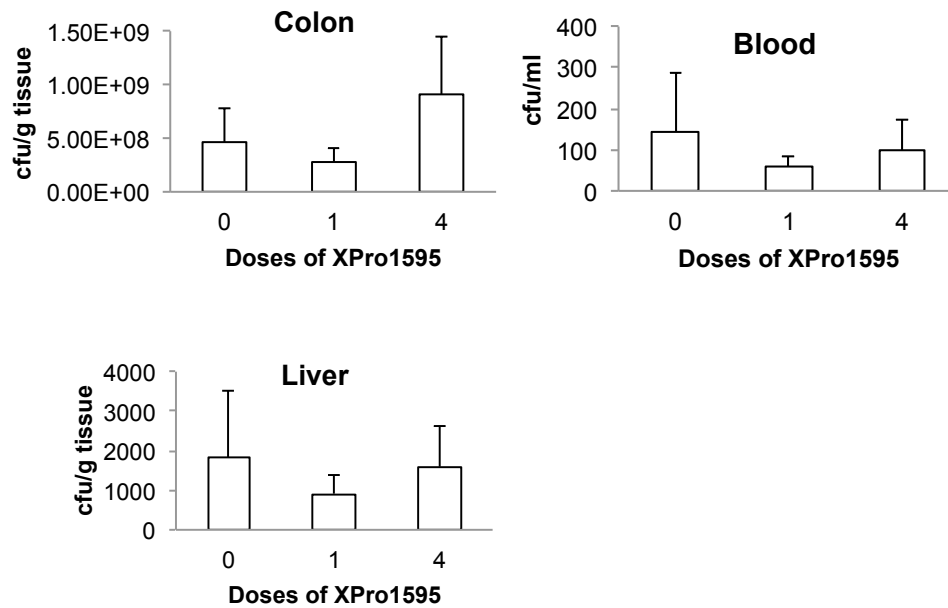

Supplement: prp20002-e00027-SD1.pdf [file prp20002-e00027-SD1.pdf]
